# Supplementary material for: Marked increase in rat red blood cell membrane protein glycosylation by one-month treatment with a cafeteria diet
Source: PeerJ. 2015 Jul 16;3:e1101. doi: 10.7717/peerj.1101 (PMC4512766; doi:10.7717/peerj.1101)
Supplement: File S1 [file peerj-03-1101-s001.xlsx]

## Sheet: Glucose
PLASMA GLUCOSES FROM THE CUT TAIL'S TIP
		Female	mM			Male	mM
	Control	1	7.24		Control	7	8.791
		2	7.147			8	8.077
		3	5.859			9	6.697
		4	6.526			10	7.007
		5	6.604			11	7.752
		6	7.627			12	7.147
	Mean		6.83383				7.5785
	Error		0.257555				0.318256
	Kafeteria	13	8.605		Kafeteria	19	9.13
		14	8.279			20	9.364
		15	8.899			21	8.946
		16	8.53			22	9.52
		17	8.279			23	9.163
		18	8.574			24	8.667
	Mean		8.52767				9.13167
	Error		0.0948141				0.123309

## Sheet: Hematòcrit
DATA USED FOR TABLE 2
	Mostra	Pes tub (g)	Pes tub + sang total (g)	Pes sang Total (g)	Volum sang Total (mL)	Pes tub + cèl·lules (g)	Pes cèlules - 8,5% P.entrempat (g)	Volum cèlules (mL)	Pes plasma (g) Psang-PCel	Volum plasma (V Sang - V Cel)	% Hematòcrit	Ẋ	DE
Femelles Control	1	6.971	10.667	3.696	3.5	8.888	1.75405	1.56612		1.93388	44.7463	43.0742	1.0603
	2	6.977	10.667	3.69	5.6125	9.9677	2.73649	2.4433		3.1692	43.5331
	3	6.944	13.7612	6.8172	6.45568	10.1865	2.96689	2.64901		3.80668	41.0337
	4	6.95	11.9864	5.0364	4.76932	9.2289	2.08519	1.86178		2.90754	39.0366
	5	6.967	14.647	7.68	7.27273	11.087	3.7698	3.36589		3.90683	46.281
	6	6.981	11.208	4.227	4.00284	9.069	1.91052	1.70582		2.29702	42.6153
Mascles Control	7	6.838	13.174	6.336	7.80152	11.452	4.22181	3.76947		4.03204	48.3172	45.6789	0.882351
	8	6.944	14.336	7.392	5.575	10.061	2.85206	2.54648		3.02852	44.93
	9	6.981	15.9658	8.9848	8.50833	11.5141	4.14779	3.70338		4.80495	43.5265
	10	7.032	17.7708	10.7388	10.1693	12.7708	5.251	4.68839		5.48092	46.1033
	13	6.996	13.12	6.124	5.79924	10.491	3.19792	2.85529		2.94395	49.2356
	14	6.978	14.47	7.492	7.0947	10.908	3.59595	3.21067		3.88403	45.2545
Femelles Kafetera	13	6.984	13.234	6.25	5.91856	9.7998	2.57646	2.30041		3.61815	38.8677	42.7011	1.82864
	14	6.997	13.241	6.244	5.91288	9.8486	2.60921	2.32966		3.58322	39.3997
	15	7.033	12.234	5.201	4.92519	9.9481	2.66732	2.38153		2.54366	48.3541
	16	6.956	12.084	5.128	4.85606	9.3646	2.20387	1.96774		2.88832	40.5213
	17	6.978	13.2118	6.2338	5.90322	10.221	2.96735	2.64942		3.2538	44.8809
	18	6.967	13.941	6.974	6.60417	10.909	3.60693	3.22047		3.38369	48.7643
Mascles Kafetera	19	6.97	16.734	9.764	9.24621	12.2277	4.8108	4.29535		4.95086	46.4553	43.7942	0.74631
	20	7.033	18.586	11.553	10.9403	13.2066	5.64884	5.04361		5.89673	46.101
	21	7.026	15.038	8.012	7.58712	10.9857	3.62313	3.23493		4.35219	42.6372
	22	7.028	15.694	8.666	8.20644	11.2419	3.85572	3.44261		4.76383	41.9501
	23	6.936	16.32	9.384	8.88636	11.735	4.39108	3.92061		4.96575	44.1194
	25	7.035	15.45	8.415	7.96875	11.275	3.8796	3.46393		4.50482	43.4689

## Sheet: Plasma Glucose
	mM Glucosa				Promedio	Prom - blanc
	0	0.082	0.081		0.0815	0
	0.687	0.136	0.137		0.1365	0.055
	1.37	0.191	0.194		0.1925	0.111
	2.75	0.295	0.306		0.3005	0.219
	5.5	0.521	0.521		0.521	0.4395
	11	0.945	0.934		0.9395	0.858
							[Glucosa] mM
				Prom - blanc	Extrapolat	Dilució 1/2	Promedio	Error	% Error
Femelles C	1	0.558		0.4765	6.06667	12.1333	10.706	0.631646
	2	0.418		0.3365	4.27179	8.54359
	3	0.572		0.4905	6.24615	12.4923
	4	0.519		0.4375	5.56667	11.1333
	5	0.449		0.3675	4.66923	9.33846
	6	0.498		0.4165	5.29744	10.5949			5.89994
Mascles C	7	0.536		0.4545	5.78462	11.5692	10.4111	0.331911
	8	0.499		0.4175	5.31026	10.6205
	9	0.495		0.4135	5.25897	10.5179
	10	0.502		0.4205	5.34872	10.6974
	11	0.471		0.3895	4.95128	9.90256
	12	0.442		0.3605	4.57949	9.15897			3.18805
	13	0.544		0.4625	5.88718	11.7744	10.8427	0.562066
Femelles K	14	0.483		0.4015	5.10513	10.2103
	15	0.597		0.5155	6.56667	13.1333
	16	0.45		0.3685	4.68205	9.3641
	17	0.497		0.4155	5.28462	10.5692
	18	0.475		0.3935	5.00256	10.0051			5.1838
	19	0.501		0.4195	5.3359	10.6718	10.9026	0.643636
Mascles K	20	0.602		0.5205	6.63077	13.2615
	21	0.471		0.3895	4.95128	9.90256
	22	0.516		0.4345	5.52821	11.0564
	23	0.46		0.3785	4.81026	9.62051
	24	0.655		0.5735	7.31026	14.6205			5.90353

## Sheet: Blood Glucose
	mM				Promedio	Prom - blanc
	0	0.084	0.082		0.083	0
	0.687	0.189	0.188		0.1885	0.1055
	1.37	0.296	0.302		0.299	0.216
	2.75	0.507	0.525		0.516	0.433
	5.5	0.929	0.952		0.9405	0.8575
	11	1.466	1.743		1.6045	1.5215
								[Glucosa] mM
				Prom - blanc	Extrapolat	Dilució 1/4	Dilució 1/1,45	Promedio	Error	% Error
Femelles C	1	0.276		0.193	1.18273	4.73094	6.85986	6.4259	0.138768
	2	0.26		0.177	1.06763	4.2705	6.19223
	3	0.261		0.178	1.07482	4.29928	6.23396
	4	0.312		0.229	1.44173	5.76691	8.36201
	5	0.26		0.177	1.06763	4.2705	6.19223
	6	0.271		0.188	1.14676	4.58705	6.65122			2.15952
Mascles C	7	0.275		0.192	1.17554	4.70216	6.81813	6.82647	0.12615
	8	0.226		0.143	0.823022	3.29209	4.77353
	9	0.28		0.197	1.21151	4.84604	7.02676
	10	0.281		0.198	1.21871	4.87482	7.06849
	11	0.276		0.193	1.18273	4.73094	6.85986
	12	0.264		0.181	1.0964	4.38561	6.35914			1.84795
Femelles K	13	0.273		0.19	1.16115	4.6446	6.73468	6.30906	0.310408
	14	0.307		0.224	1.40576	5.62302	8.15338
	15	0.274		0.191	1.16835	4.67338	6.7764
	16	0.257		0.174	1.04604	4.18417	6.06705
	17	0.274		0.191	1.16835	4.67338	6.7764
	18	0.236		0.153	0.894964	3.57986	5.19079			4.92003
Mascles K	19	0.259		0.176	1.06043	4.24173	6.1505	5.92796	0.373318
	20	0.252		0.169	1.01007	4.04029	5.85842
	21	0.222		0.139	0.794245	3.17698	4.60662
	22	0.279		0.196	1.20432	4.81727	6.98504
	23	0.221		0.138	0.78705	3.1482	4.56489
	24	0.268		0.185	1.12518	4.50072	6.52604			6.29758

## Sheet: Cell Glucose
Hematròcrit											[Glucosa] sang total desprot (perclòric)						[Glucosa] plasma						[Glucosa CÈL]
	Mostra	% Hematòcrit	Ẋ	Error		HC	1-HC	Volum sang Total (mL)	Volum plasma (mL) (V Sang - V Cel)	Volum cèlules (mL)			Mostra	mM	Ẋ	Error			Mostra	mM	Ẋ	Error			Mostra	mM	Ẋ	Error
Femelles Control	1	44.7463	43.0742	1.0603		0.447463	0.552537	3.5	1.93388	1.56612		Femelles Control	1	6.85986	6.4259	0.138768		Femelles Control	1	12.1333	10.706	0.631646		Femelles Control	1	0.348053	2.76437	0.565069
	2	43.5331				0.435331	0.564669	5.6125	3.1692	2.4433			2	6.19223					2	8.54359					2	3.14228
	3	41.0337				0.410337	0.589663	6.45568	3.80668	2.64901			3	6.23396					3	12.4923					3	-2.75942
	4	39.0366				0.390366	0.609634	4.76932	2.90754	1.86178			4	8.36201					4	11.1333					4	4.03405
	5	46.281				0.46281	0.53719	7.27273	3.90683	3.36589			5	6.19223					5	9.33846					5	2.54036
	6	42.6153			2.46156	0.426153	0.573847	4.00284	2.29702	1.70582			6	6.65122					6	10.5949					6	1.3408
Mascles Control	7	48.3172	45.6789	0.882351		0.483172	0.516828	7.80152	4.03204	3.76947		Mascles Control	7	6.81813	6.82647	0.12615		Mascles Control	7	11.5692	10.4111	0.331911		Mascles Control	7	1.73608	2.75082	0.32351
	8	44.93				0.4493	0.5507	5.575	3.02852	2.54648			8	4.77353					8	10.6205					8	-2.39304
	9	43.5265				0.435265	0.564735	8.50833	4.80495	3.70338			9	7.02676					9	10.5179					9	2.49712
	10	46.1033				0.461033	0.538967	10.1693	5.48092	4.68839			10	7.06849					10	10.6974					10	2.8261
	11	49.2356				0.492356	0.507644	5.79924	2.94395	2.85529			11	6.85986					11	9.90256					11	3.72267
	12	45.2545			1.93164	0.452545	0.547455	7.0947	3.88403	3.21067			12	6.35914					12	9.15897					12	2.9721
Femelles Kafetera	13	42.7	42.7011	1.82864		0.427	0.573	5.91856	3.61815	2.30041		Femelles Kafetera	13	6.73468	6.30906	0.310408		Femelles Kafetera	13	11.7744	10.8427	0.562066		Femelles Kafetera	13	-0.0281767	0.329629	0.269653
	14	39.3997				0.393997	0.606003	5.91288	3.58322	2.32966			14	8.15338					14	10.2103					14	4.98972
	15	48.3541				0.483541	0.516459	4.92519	2.54366	2.38153			15	6.7764					15	13.1333					15	-0.0132793
	16	40.5213				0.405213	0.594787	4.85606	2.88832	1.96774			16	6.06705					16	9.3641					16	1.22752
	17	44.8809				0.448809	0.551191	5.90322	3.2538	2.64942			17	6.7764					17	10.5692					17	2.11835
	18	48.7643			4.28242	0.487643	0.512357	6.60417	3.38369	3.22047			18	5.19079					18	10.0051					18	0.132454
Mascles Kafetera	19	46.4553	43.7942	0.74631		0.464553	0.535447	9.24621	4.95086	4.29535		Mascles Kafetera	19	6.1505	5.92796	0.373318		Mascles Kafetera	19	10.6718	10.9026	0.643636		Mascles Kafetera	19	2.28654	-0.526685	0.962996
	20	46.101				0.46101	0.53899	10.9403	5.89673	5.04361			20	5.85842					20	13.2615					20	-4.24511
	21	42.6372				0.426372	0.573628	7.58712	4.35219	3.23493			21	4.60662					21	9.90256					21	1.10259
	22	41.9501				0.419501	0.580499	8.20644	4.76383	3.44261			22	6.98504					22	11.0564					22	-1.3345
	23	44.1194				0.441194	0.558806	8.88636	4.96575	3.92061			23	4.56489					23	9.62051					23	-1.74386
	24	43.4689			1.70413	0.434689	0.565311	7.96875	4.50482	3.46393			24	6.52604					24	14.62					24	-2.9442
