# Supplementary material for: Marked increase in rat red blood cell membrane protein glycosylation by one-month treatment with a cafeteria diet
Source: PeerJ. 2015 Jul 16;3:e1101. doi: 10.7717/peerj.1101 (PMC4512766; doi:10.7717/peerj.1101)
Supplement: File S3 [file peerj-03-1101-s003.xls]

## Sheet: Memb
PROTEÏNES DE MEMBRANA I ALS GLÒBULS
Abs	memb	memb	hb	hb	plasma 1/5	plasma1/5
1	0.188	0.158	0.343	0.383
2	0.252	0.212	0.323	0.309	0.842	0.896
3	0.055	0.055	0.279	0.264	0.98	0.931
4	0.293	0.137	0.252	0.238	0.735	0.853
5	0.232	0.216			824	0.905
6	0.125	0.129	0.543	0.541
7	0.109	0.134	0.273	0.293	1.061	1.085
8	0.209	0.183	0.407	0.411	1.037	0.843
9	0.093		0.181	0.193	0.994	1.129
10	0.219	0.208	0.461	0.415	1.115	1.119
12	0.202	0.182	0.214	0.236
13	0.18	0.191	0.327	0.37	1.02	1.189
14	0.135	0.127	0.215	0.199	1.097	1.082
15	0.128	0.154	0.47	0.486	0.933	0.983
16	0.143	0.38	0.4	0.383	0.908	1.047
17	0.148	0.142	0.389	0.568	0.936	0.958
18	0.142	0.168	0.468	0.619
19	0.321	0.332	0.421	0.467
20	0.139	0.172	0.404	0.37	1.094	1.123
21	0.241	0.233	0.439	0.422	1.103	1.139
22	0.184	0.182	0.399	0.459
23	0.236	0.222	0.438	0.422	1.036	1.062
24	0.252	0.226	0.482	0.476	1.093	0.909
patró
abs	mitja
0	0
25	0.123
50	0.218
100	0.3435
200	0.545

## Sheet: relacions absorbancies
			ABSORBÀNCIES HMF
Fosfor	740		mitja 740	830		mitja 830		hmf			mitja HMF	Relació H/7	Relació H/8
1	0.266	0.135	0.2005	0.451	0.197	0.324		1	0.223	0.194	0.2085	1.0399	0.643519
2	0.224	0.101	0.1625	0.34	0.244	0.292
3	0.138	0.185	0.1615	0.207	0.238	0.2225		3	0.103	0.092	0.0975	0.603715	0.438202
4	0.373	0.369	0.371	0.634	0.608	0.621		4	0.182	0.172	0.177	0.477089	0.285024
5	0.209	0.208	0.2085	0.335	0.356	0.3455
6	0.165	0.294	0.2295	0.275	0.471	0.373		6	0.089	0.127	0.108	0.470588	0.289544
7	0.167	0.15	0.1585	0.255	0.247	0.251		7	0.085	0.079	0.082	0.51735	0.326693
8	0.187	0.198	0.1925	0.291	0.14	0.2155		8	0.135	0.131	0.133	0.690909	0.617169
9	0.159	0.169	0.164	0.235	0.242	0.2385		9	0.07	0.061	0.0655	0.39939	0.274633
10	0.237	0.252	0.2445	0.394	0.404	0.399		10	0.107	0.105	0.106	0.433538	0.265664
12	0.167	0.169	0.168	0.27	0.27	0.27		12	0.109	0.118	0.1135	0.675595	0.42037
13	0.2	0.178	0.189	0.332	0.31	0.321		13	0.364	0.359	0.3615	1.9127	1.12617
14	0.137	0.241	0.189	0.402	0.407	0.4045		14	0.346	0.308	0.327	1.73016	0.808405
15	0.16	0.169	0.1645	0.26	0.26	0.26		15	0.38	0.468	0.424	2.57751	1.63077
16	0.239	0.227	0.233	0.413	0.393	0.403		16	0.387	0.338	0.3625	1.55579	0.899504
17	0.268	0.239	0.2535	0.414	0.378	0.396		17	0.235	0.168	0.2015	0.794872	0.508838
18	0.208	0.192	0.2	0.332	0.312	0.322		18	0.195	0.245	0.22	1.1	0.68323
19	0.321	0.302	0.3115	0.558	0.519	0.5385		19	0.136	0.123	0.1295	0.41573	0.240483
20	0.14	0.162	0.151	0.191	0.236	0.2135		20	0.477	0.836	0.6565	4.34768	3.07494
21	0.151	0.424	0.2875	0.238	0.731	0.4845		21	0.262	0.358	0.31	1.07826	0.639835
22	0.216	0.151	0.1835	0.372	0.235	0.3035		22	0.527	0.431	0.479	2.61035	1.57825
23	0.178	0.208	0.193	0.27	0.309	0.2895		23	0.405	0.405	0.405	2.09845	1.39896
24	0.111	0.135	0.123	0.174	0.196	0.185		24	0.357	0.398	0.3775	3.06911	2.04054
			0.209458			0.339896
	M fosfor 740		M fosfor 830	M HMF	relacio HMF/740	relacio HMF/830
mascle C	0.215333		0.363	0.14775	0.686146	0.407025
Femella C	0.1855		0.2748	0.1	0.539084	0.363901
mascle K	0.204833		0.351083	0.316083	1.54312	0.900309
Femella K	0.1924		0.306	0.392917	2.04219	1.28404

## Sheet: Patro fl
Patro FL
mostres	abs 740		mitjana	abs 830		mitjana
0	0.034	0.032	0.033	0.059	0.052	0.0555
0.5	0.161	0.16	0.1605	0.289	0.289	0.289
1	0.286	0.257	0.2715	0.51	0.469	0.4895
2	0.512	0.469	0.4905	0.936	0.857	0.8965
5	1.233	1.237	1.235	2.23	2.247	2.2385
7	1.701	1.679	1.69
											mitja	micrograms de fopsfolipid
									0.066	0.066	0.066	0
									0.385	0.226	0.3055	10
									0.406	0.414	0.41	40
									0.845	0.938	0.8915	80
									2.117	2.216		100
												mmol
												0
												1.31579e-05
												5.26316e-05
												0.000105263
Fosfat total

## Sheet: Fosfats
Fosfor	740		mitja 740	830		mitja 830
1	0.266	0.135	0.2005	0.451	0.197	0.324
2	0.224	0.101	0.1625	0.34	0.244	0.292
3	0.138	0.185	0.1615	0.207	0.238	0.2225
4	0.373	0.369	0.371	0.634	0.608	0.621
5	0.209	0.208	0.2085	0.335	0.356	0.3455
6	0.165	0.294	0.2295	0.275	0.471	0.373
7	0.167	0.15	0.1585	0.255	0.247	0.251
8	0.187	0.198	0.1925	0.291	0.14	0.2155
9	0.159	0.169	0.164	0.235	0.242	0.2385
10	0.237	0.252	0.2445	0.394	0.404	0.399
12	0.167	0.169	0.168	0.27	0.27	0.27
13	0.2	0.178	0.189	0.332	0.31	0.321
14	0.137	0.241	0.189	0.402	0.407	0.4045
15	0.16	0.169	0.1645	0.26	0.26	0.26
16	0.239	0.227	0.233	0.413	0.393	0.403
17	0.268	0.239	0.2535	0.414	0.378	0.396
18	0.208	0.192	0.2	0.332	0.312	0.322
19	0.321	0.302	0.3115	0.558	0.519	0.5385
20	0.14	0.162	0.151	0.191	0.236	0.2135
21	0.151	0.424	0.2875	0.238	0.731	0.4845
22	0.216	0.151	0.1835	0.372	0.235	0.3035
23	0.178	0.208	0.193	0.27	0.309	0.2895
24	0.111	0.135	0.123	0.174	0.196	0.185
			0.209458			0.339896
Fosfat total					fosfat
	740	830	mitja		mostra	mmol P				1.83941e-05
1	0.686066	0.619913	0.652989		1	1.83941e-05
2	0.530328	0.546332	0.53833		2	1.51642e-05
3	0.52623	0.386526	0.456378		3	1.28557e-05
4	1.38484	1.30283	1.34383		4	3.78544e-05
5	0.718852	0.669349	0.694101		5	1.95521e-05
6	0.804918	0.732582	0.76875		6	2.16549e-05
7	0.513934	0.452058	0.482996		7	1.36055e-05
8	0.653279	0.37043	0.511854		8	1.44184e-05
9	0.536475	0.423316	0.479896		9	1.35182e-05
10	0.866393	0.792366	0.82938		10	2.33628e-05
12	0.552869	0.495746	0.524308		12	1.47692e-05
13	0.638934	0.613014	0.625974		13	1.76331e-05
14	0.638934	0.805013	0.721974		14	2.03373e-05
15	0.538525	0.472752	0.505638		15	1.42433e-05
16	0.819262	0.801564	0.810413		16	2.28285e-05
17	0.903279	0.785468	0.844373		17	2.37852e-05
18	0.684016	0.615314	0.649665		18	1.83004e-05
19	1.14098	1.11313	1.12706		19	3.17481e-05
20	0.483197	0.365831	0.424514		20	1.19581e-05
21	1.04262	0.988963	1.01579		21	2.86139e-05
22	0.616393	0.572775	0.594584		22	1.67489e-05
23	0.655328	0.540584	0.597956		23	1.68438e-05
24	0.368443	0.300299	0.334371		24	9.41889e-06
mitja	0.72278	0.656463	0.689622
					mostra	mmol PL
					1	2.95675e-05
					2	2.50854e-05
					3	1.5351e-05
					4	7.11665e-05
					5	3.25789e-05
					6	3.64306e-05
					7	1.93428e-05
					8	1.43706e-05
					9	1.7592e-05
					10	4.00723e-05
					12	2.2004e-05
					13	2.91473e-05
					14	4.08426e-05
					15	2.06034e-05
					16	4.06325e-05
					17	3.96521e-05
					18	2.92874e-05
					19	5.96112e-05
					20	1.40904e-05
					21	5.20477e-05
					22	2.66962e-05
					23	2.47353e-05
					24	1.00986e-05

## Sheet: HMF
HMF			mitja HMF
1	0.223	0.194	0.2085
3	0.103	0.092	0.0975						µg HMF	mitjana
4	0.182	0.172	0.177						0	0
6	0.089	0.127	0.108						10	0.189
7	0.085	0.079	0.082						50	0.655
8	0.135	0.131	0.133						100	1.334
9	0.07	0.061	0.0655						200	2.709
10	0.107	0.105	0.106		Grup	Mitja
12	0.109	0.118	0.1135		MC	0.14775
13	0.364	0.359	0.3615		FC	0.1
14	0.346	0.308	0.327		MK	0.316083
15	0.38	0.468	0.424		FK	0.392917
16	0.387	0.338	0.3625
17	0.235	0.168	0.2015
18	0.195	0.245	0.22
19	0.136	0.123	0.1295
20	0.477	0.836	0.6565
21	0.262	0.358	0.31
22	0.527	0.431	0.479
23	0.405	0.405	0.405
24	0.357	0.398	0.3775
resultats
							mostra	mmol HMF
HMF	µg HMF						1	0.000116695
1	14.7164						3	5.10097e-05
3	6.43284						4	9.80546e-05
4	12.3657						6	5.72232e-05
6	7.21642		Grup	µg HMF			7	4.18374e-05
7	5.27612		MC	10.1828			8	7.20172e-05
8	9.08209		FC	6.6194			9	3.20734e-05
9	4.04478		MK	22.745			10	5.60397e-05
10	7.06716		FK	28.4789			12	6.04779e-05
12	7.62687						13	0.000207234
13	26.1343						14	0.000186819
14	23.5597						15	0.000244219
15	30.7985						16	0.000207826
16	26.209						17	0.000112553
17	14.194						18	0.0001235
18	15.5746						19	6.9946e-05
19	8.8209						20	0.000381804
20	48.1493						21	0.000176759
21	22.291						22	0.000276766
22	34.903						23	0.000232976
23	29.3806						24	0.000216703
24	27.3284

## Sheet: Hoja1
dades Marià
mostra	mmol HMF		mostra	mmol PL
1	0.000116695		1	2.95675e-05
3	5.10097e-05		2	2.50854e-05
4	9.80546e-05		3	1.5351e-05
6	5.72232e-05		4	7.11665e-05
7	4.18374e-05		5	3.25789e-05
8	7.20172e-05		6	3.64306e-05
9	3.20734e-05		7	1.93428e-05
10	5.60397e-05		8	1.43706e-05
12	6.04779e-05		9	1.7592e-05
13	0.000207234		10	4.00723e-05
14	0.000186819		12	2.2004e-05
15	0.000244219		13	2.91473e-05
16	0.000207826		14	4.08426e-05
17	0.000112553		15	2.06034e-05
18	0.0001235		16	4.06325e-05
19	6.9946e-05		17	3.96521e-05
20	0.000381804		18	2.92874e-05
21	0.000176759		19	5.96112e-05
22	0.000276766		20	1.40904e-05
23	0.000232976		21	5.20477e-05
24	0.000216703		22	2.66962e-05
			23	2.47353e-05
			24	1.00986e-05
