# Supplementary material for: Marked increase in rat red blood cell membrane protein glycosylation by one-month treatment with a cafeteria diet
Source: PeerJ. 2015 Jul 16;3:e1101. doi: 10.7717/peerj.1101 (PMC4512766; doi:10.7717/peerj.1101)
Supplement: File S4 [file peerj-03-1101-s004.xlsx]

## Sheet: Weight
RAT WEIGHTS
	Mascles C	Individu	7	8	9	10	13	14	Promig (g)	Error		Femelles C	Individu	1	2	3	4	5	6	Promig (g)	Error
		Dia											Dia
	absolut	0	397	423	391	376	396	378	393.5	6.93181		absolut	0	225	228	259	239	243	233	237.833	5.03598
		2	399	427	392	379	394	382	395.5	7.23072			2	228	230	259	240	248	230	239.167	5.0492
		4	404	432	405	399	403	384	404.5	5.42064			4	232	236	260	241	247	238	242.333	4.08792
		7	413	439	413	405	425	388	413.833	5.41603			7	228	240	261	242	251	246	244.667	4.52892
		9	419	448	416	411	443	394	421.833	6.88356			9	234	242	275	246	254	252	250.5	5.71402
		11	423	458	427	420	444	395	427.833	6.5866			11	230	242	265	249	257	250	248.833	4.9357
		14	433	468	435	428	461	399	437.333	7.41058			14	244	241	276	254	266	257	256.333	5.39547
		16	438	475	438	433	467	404	442.5	7.88141			16	241	247	280	260	258	254	256.667	5.48736
		18	442	489	444	450	472	413	451.667	8.32466			18	245	250	281	261	274	259	261.667	5.61941
		21	448	489	449	452	485	422.619	457.603	8.38948			21	248	256	292	268	278	267	268.167	6.37922
		23	451	496	452	458	487	423.987	461.331	8.62844			23	241	259	284	268	281	275	268	6.54217
		25	458	497	456	466	492	432.193	466.866	7.89726			25	248	263	295	273	280	280	273.167	6.60008
		28	464	500	457	468	500	436.296	470.883	8.42813			28	257	266	301	275	277	276	275.333	6.0148
		30	467	503	458	469	506	438	473.5	9.07653			30	258	268	297	274	281	276	275.667	5.34582
		Increment de pes (g)	70	80	67	93	110	60	80	7.61139			Increment de pes (g)	36	40	38	35	38	43	38.3333	1.17379
	Mascles K
		Individu	19	20	21	22	23	25	Promig (g)	Error		Femelles K
		Dia
	absolut	0	379	376	377	389	371	384	379.333	2.59058			Individu	13	14	15	16	17	18	Promig (g)	Error
		1	389	389	393	406	395	385.09	392.848	2.98569			Dia
		3	408	400	408	416	409	407.4	408.067	2.07632		absolut	0	202	219	214	230	216	218	216.5	3.68556
		6	430	413	421	435	429	437.47	427.578	3.72654			2	204	223	220	243	228	239	226.167	5.74698
		8	445	430	430	443	444	447.17	439.862	3.16909			4	214	233	233	253	238	239	235	5.15752
		10	454	443	445	450	454	454.93	450.155	2.08295			7	223	242	238	259	245	255	243.667	5.25145
		13	478	459	454	470	462	466.57	464.928	3.47579			9	230	256	251	266	251	262	252.667	5.14889
		15	483	465	466	474	474	479.18	473.53	2.89544			11	231	258	250	267	252	265	253.833	5.33802
		17	483	468	469	481	482	485.97	478.162	3.13243			14	239	274	266	279	257	274	264.833	6.05209
		20	485	473	474	494	489	501.49	486.082	4.57129			16	243	282	272	279	265	268	268.167	5.67695
		22	491	481	489	508	493	506	494.667	4.24788			18	249	290	278	276	260	276	271.5	5.95399
		24	499	485	487	504	503	514.1	498.683	4.50336			21	256	296	285	281	263	273	275.667	6.00925
		27	508	484	493	517	510	517	504.833	5.49798			23	252	299	281	285	270	282	278.167	6.46744
		30	518	508	513	526	516	520	516.833	2.50887			25	255	306	289	289	272	283	282.333	7.07892
													28	266	312	298	291	285	284	289.333	6.28048
		Increment de pes (g)	139	132	136	137	145	136	137.5	1.76541			30	267	318	302	287	278	291	290.5	7.32462
													Increment de pes (g)	65	99	88	57	62	73	74	6.67333

## Sheet: Ingesta control
CONTROL RAT INTAKE
		JAULA C1			JAULA C3				JAULA C5
		HEMBRA 1	HEMBRA 2			HEMBRA 3	HEMBRA 4			HEMBRA 5	HEMBRA 6
		Pienso ingerido (g)				Pienso ingerido (g)				Pienso ingerido (g)
	DIA 0 (7 OCT.)				DIA 0 (15 OCT.)				DIA 0 (4 nov.)
	DIA 2	65.89			DIA 1	35.41			DIA 2	70.98
	DIA 4	65.1			DIA 3	63.42			DIA 4	67.18
	DIA 7	84.03			DIA 6	105.79			DIA 7	108.94
	DIA 9	59.79			DIA 8	76.69			DIA 9	70.97
	DIA 11	49.5			DIA 10	64.75			DIA 11	71.3
	DIA 14	96.21			DIA 13	116.87			DIA 14	112.08
	DIA 16	56.36			DIA 15	70.14			DIA 16	68.37
	DIA 18	62.08			DIA 16	38.07			DIA 18	78.17
	DIA 21	93.14			DIA 20	151.33			DIA 21	112.56
	DIA 23	58.96			DIA 22	73.06			DIA 23	82.42
	DIA 24	32.54			DIA 24	78.95			DIA 25	79.71
	DIA 28	120.53			DIA 27	111.31			DIA 28	108.44
	DIA 30 (6 NOV.)	66.03			DIA 29	82.79			DIA 30 (4 dic.)	90.35
	(MUERTE)	910.16			DIA 30 (14 NOV.)	29.53			(MUERTE)	1121.47
					(MUERTE)	1098.11
	kJ ingerits animal	5506.47											PROMIG	ERROR
					kJ ingerits animal	6643.57			kJ ingerits animal	6784.89		KJ/ animal	6311.64	404.649
		JAULA C2				JAULA C4				JAULA C7
		MACHO 7	MACHO 8			MACHO 9	MACHO 10			MACHO 13	MACHO 14
		Pienso ingerido (g)				Pienso ingerido (g)				Pienso ingerido (g)
	DIA 0 (7 OCT.)				DIA 0 (15 OCT.)				DIA 0 (7 OCT.)
	DIA 2	-6.9			DIA 1	45.77			DIA 2	54.93
	DIA 4	103.86			DIA 3	83.46			DIA 4	106.08
	DIA 7	140.59			DIA 6	130.77			DIA 7	165.77
	DIA 9	101.25			DIA 8	93.53			DIA 9	150.26
	DIA 11	99.79			DIA 10	89.95			DIA 11	54.26
	DIA 14	149.73			DIA 13	137.11			DIA 14	137.15
	DIA 16	102.23			DIA 15	99.57			DIA 16	115.28
	DIA 18	103.54			DIA 16	49.77			DIA 18	120.27
	DIA 21	133.47			DIA 20	167.11			DIA 21	160.17
	DIA 23	98.54			DIA 22	101.99			DIA 23	106.1
	DIA 24	52.48			DIA 24	92.13			DIA 24	99.58
	DIA 28	169.52			DIA 27	129.19			DIA 28	150.22
	DIA 30 (6 NOV.)	108.03			DIA 29	97.03			DIA 30 (6 NOV.)	127.79
	(MUERTE)	1356.13			DIA 30 (14 NOV.)	51.01			(MUERTE)	1547.86
					(MUERTE)	1368.39
	kJ ingerits animal	8204.59							kJ ingerits animal	9364.55			PROMIG	ERROR
					kJ ingerits animal	8278.76						KJ/ animal	8615.97	374.905

## Sheet: Ingesta CAF
CAFETERIA RAT INTAKE
		JAULA K1								JAULA K3								JAULA K5
		HEMBRA 13	HEMBRA 14	HEMBRA 15						HEMBRA 16								HEMBRA 17	HEMBRA 18
		PIENSO	BACON	GALLETAS	LECHE	PATÉ				PIENSO	BACON	GALLETAS	LECHE	PATÉ				PIENSO	BACON	GALLETAS	LECHE	PATÉ
	DIA 0 (8OCT.)								DIA 0 (14 OCT.)								DIA 0 (4 NOV.)
	DIA 1	2.81	24	35.06	66	16.68			DIA 2	-0.24	19.22	22.1	45	17.48			DIA 2	5.08	36.77	50.4	89	22.16
	DIA 3	2.67	51.12	70.91	138	31.16			DIA 4	5.26	8.44	19.37	41	13.53			DIA 4	3.93	22.08	48.46	50	19.24
	DIA 6	24.5	65.19	105.23	185	47.95			DIA 7	14.96	18.36	33.98	61	26.48			DIA 7	26.42	34.34	74	108	35.22
	DIA 8	13.16	39.61	62.46	147	18.79			DIA 9	8.52	13.53	23.78	46	13.83			DIA 9	23.13	18.47	48.95	95	19.67
	DIA 10	6.22	27	71.01	146	37.68			DIA 11	12.03	10.74	16.6	55	11.89			DIA 11	19.21	18.48	37.9	95	17.22
	DIA 13	29.84	43.5	112.99	193	47.79			DIA 14	23.48	16.24	34.85	60	20.8			DIA 14	38.44	21.63	65.94	93	33.12
	DIA 15	10.49	25.79	72.7	133	26.01			DIA 16	17.52	8.68	16.4	39	9.56			DIA 16	25.39	11.64	38.86	95	16.21
	DIA 17	7.16	30.14	72.71	135	25.27			DIA 17	7.92	7.03	13.9	63	4.38			DIA 18	31.36	11.72	45.55	68	19.57
	DIA 20	20.91	46.22	114.83	206	47.69			DIA 21	38.67	25.12	21.5	86	28.83			DIA 21	48.59	18.19	35.3	102	33.04
	DIA 22	6.5	31.44	76.78	122	25.4			DIA 23	16.56	7.52	14.2	44	18.4			DIA 23	30.97	13.47	23.08	65	31.3
	DIA 23	8.65	15.42	10.44	109	13.57			DIA 25	13.76	8.71	13.1	70	11.2			DIA 25	36.18	11.02	46.1	55	22.09
	DIA 27	24.02	68.17	146.63	248	75.87			DIA 28	31.16	12.67	12.5	60	15.77			DIA 28	42.02	19.52	40.8	130	37.12
	DIA 29	10.28	34.05	123	131	23.48			DIA 30 (13 NOV.)	19.14	12.5	21.1	93	17.31			DIA 30 (4 DIC.)	29.81	9.69	17.55	55	26.71
	DIA 30 (7 NOV.)	3.25	15.13	25.24	126	16.44			(MUERTE)								(MUERTE)
	(MUERTE)								SUMA	208.74	168.76	263.38	763	209.46			SUMA	360.53	247.02	572.89	1100	332.67
	SUMA	170.46	516.78	1099.99	2085	453.78																				PROMIG	ERROR
	kJ/animal	687.522	2618.35	7076.6	5712.9	2135.79	18231.2		kJ/animal	2525.75	2565.15	5083.23	6271.86	2957.58	19403.6		kJ/animal	2181.21	1877.35	5528.39	4521	2348.65	16456.6		KJ/ animal	18030.4	856.619
	JAULA K2								JAULA K4								JAULA K2
		MACHO 19								MACHO 20	MACHO 21	MACHO 22						MACHO 23	MACHO 24
		PIENSO	BACON	GALLETAS	LECHE	PATÉ				PIENSO	BACON	GALLETAS	LECHE	PATÉ				PIENSO	BACON	GALLETAS	LECHE	PATÉ
	DIA 0 (8OCT.)								DIA 0 (14 OCT.)								DIA 0 (8OCT.)
	DIA 1	11.5	8.33	12.58	39	25.6			DIA 2	12.98	60.62	76.28	140	34.31			DIA 1	9.02	19.06	12.86	53	12.2
	DIA 3	15.35	13.89	23.98	55	13.46			DIA 4	24.93	64.5	84.1	128	54.11			DIA 3	34.12	27.46	50.34	88	28.13
	DIA 6	17.59	22.07	33.17	59	18.04			DIA 7	55.5	86.3	102	174	70.2			DIA 6	42.15	41.02	78.77	112	36.12
	DIA 8	12.44	12.91	18.93	46	17.31			DIA 9	36.5	61.8	93.26	120	44.51			DIA 8	36.15	28.59	61.15	93	37.5
	DIA 10	19.6	13.36	20.51	45	13.15			DIA 11	38.16	86.48	93.37	135	47.18			DIA 10	33.17	20.39	63.34	94	29.78
	DIA 13	21.07	16.29	30.97	65	23.47			DIA 14	50.11	103.2	133	179	71.5			DIA 13	46.79	30.42	73.83	127	39.55
	DIA 15	25.2	10.12	26.77	64	12.87			DIA 16	44.1	70.6	94.61	135	45.08			DIA 15	40.91	20.38	66.77	126	36.24
	DIA 17	15.06	9.22	12.15	43	12.78			DIA 17	43.11	69.54	68.5	140	39.98			DIA 17	42.31	21.76	50.09	75	38.11
	DIA 20	23.7	22.65	38.3	65	28.91			DIA 21	63.5	103.89	159	249	95.8			DIA 20	60.44	37.08	45.13	100	43.42
	DIA 22	10.15	15.2	20.26	65	15.03			DIA 23	40.6	56.11	134.5	121	54.88			DIA 22	47.51	24.07	57.5	96	38.25
	DIA 23	23.15	5.38	62.13	53	36.11			DIA 25	42.5	63.2	63.5	113	48.9			DIA 23	37.32	38.5	30.11	124	33.25
	DIA 27	33.25	27.5	45.08	98	48.19			DIA 28	47.9	71.5	113.49	165	48.87			DIA 27	44.27	36.33	38.09	115	45.55
	DIA 29	29.1	15.77	11.2	46	13			DIA 30 (13 NOV.)	56.2	70.6	115.6	142	53.1			DIA 29	49.5	36.7	44.15	115	46.15
	DIA 30 (7 NOV.)	28.8	4.76	3.45	43	44.5			(MUERTE)								DIA 30 (7 NOV.)	44.11	29.6	48.6	132	52.11
	(MUERTE)																(MUERTE)
	SUMA	285.96	197.45	359.48	786	322.42			SUMA	556.09	968.34	1331.21	1941	708.42			SUMA	558.75	392.3	707.87	1397	504.16				PROMIG	ERROR
	kJ/animal	3460.12	3001.24	6941.56	6460.92	4552.57	24416.4		kJ/animal	2242.9	4906.26	8568.56	5318.34	3334.3	21036		kJ/animal	3380.44	2981.48	6834.48	5741.67	3559.37	18938.1		KJ/ animal	21463.5	1595.84
